# Supplementary material for: Understanding supercapacitive performance of a N-doped vanadium carbide/carbon composite as an anode material in an all pseudocapacitive asymmetric cell
Source: Royal Society of Chemistry journal article supplement (doi:10.1039/d3se00092c), 2023-01-01
Supplement: d3se00092c1.pdf [file d3se00092c1.pdf]

## Supplementary Material for

# Understanding Supercapacitive Performance of N-doped Vanadium Carbide/Carbon Composite as Anode Material in an All Pseudocapacitive Asymmetric Cell

Hem Kanwar Rathore,<sup>1,§</sup> Muruganandham Hariram,<sup>1,§</sup> Mukhesh K Ganesha,<sup>2</sup> Ashutosh K Singh,<sup>2</sup> Debanjan Das,<sup>3</sup> Manoj Kumar,<sup>1</sup> Kamleendra Awasthi,<sup>1</sup> Debasish Sarkar<sup>1,\*</sup>

<sup>1</sup>Department of Physics, Malaviya National Institute of Technology Jaipur, Rajasthan-302017, India.

<sup>2</sup>Centre for Nano and Soft Matter Sciences, Bengaluru- 562162, India.

<sup>3</sup>Analytical Chemistry and Center for Electrochemical Sciences, Ruhr-University Bochum, 44780 Bochum, Germany

\*Corresponding author: E-Mail: [deb.sarkar1985@gmail.com](mailto:deb.sarkar1985@gmail.com) ; [debasish.phy@mnit.ac.in](mailto:debasish.phy@mnit.ac.in)

<sup>§</sup>Authors contributed equally to this work.

**Electrochemical Performance evaluation of single electrode and asymmetric supercapacitor (ASC)**

The gravimetric capacitance ( $C_s$ , F/g) and areal capacitance ( $C_a$ , F/cm<sup>2</sup>) values of the single electrode are estimated from the discharge time of charge-discharge profiles according to the following equations:

$$C_s = \frac{i * \Delta t}{m * \Delta V} \quad (1)$$

$$C_a = \frac{m}{A} C_s \quad (2)$$

where  $i$  (A) represents discharge current,  $\Delta t$  (s) is the discharge time,  $m$  (g) is the active mass of electrode material,  $\Delta V$  (V) is the stable potential window, and  $A$  (cm<sup>2</sup>) refers to the effective surface area of the electrode.

Moreover, capacitance values are also estimated from the area under cyclic voltammograms (CV) at a specific scan rate according to the following equations:

$$C_s = \frac{\int i dV}{2 * m * v * \Delta V} \quad (3)$$

$$C_a = \frac{m}{A} C_s \quad (4)$$

where  $i$  (A) is the current response,  $dV$  (V) is the voltage differential,  $m$  (g) is the active mass of material,  $v$  (V/s) is the scan rate, and  $\Delta V$  (V) is the stable operating potential window, and  $A$  (cm<sup>2</sup>) is the effective surface area of the electrode. The capacitance values of the ASC are estimated from the same equations. However, mass ( $m$ , g) in the case of the two-electrode configuration is the total mass of both electrode active materials.

The energy density ( $E$ , Wh/kg), power density ( $P$ , W/kg), equivalent series resistance (ESR), and maximum power ( $P_{\max}$ ) of assembled asymmetric supercapacitor (ASC) were measured using these equations:

$$E = \frac{1}{2 * 3.6} C_s \Delta V^2 \quad (5)$$

$$P = \frac{3600 * E}{\Delta t} \quad (6)$$

$$ESR = \frac{iR_{drop}}{2i} \quad (7)$$

$$P_{max} = \frac{\Delta V^2}{4 * ESR * m} \quad (8)$$

where  $C_s$  (F/g) is the gravimetric capacitance of the ASC,  $\Delta V$  (V) is the discharge voltage,  $\Delta t$  (s) is the discharge time,  $i$  (A) is the discharge current, and  $m$  is the total mass of both electro-active materials.

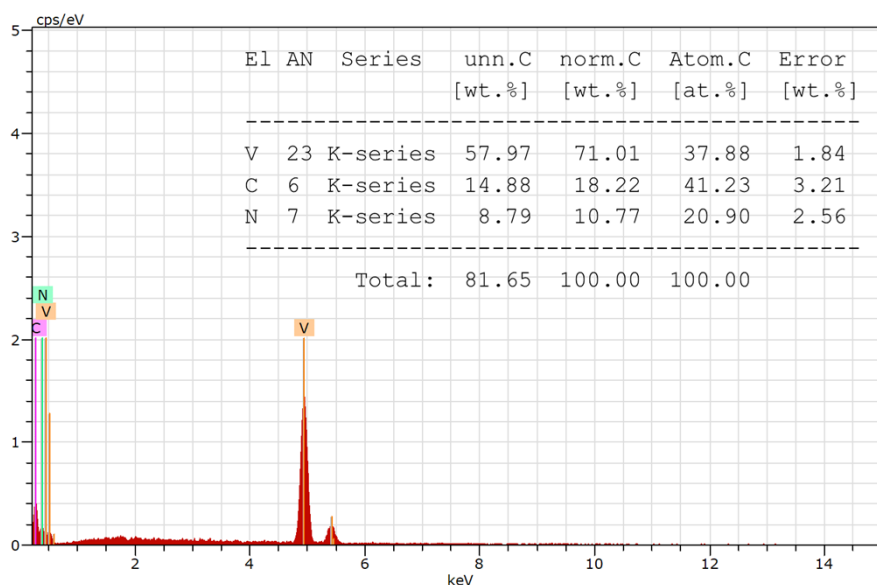

**Fig. S1** EDS spectra for as-synthesized N-doped  $V_4C_3/C$  nanohybrid.

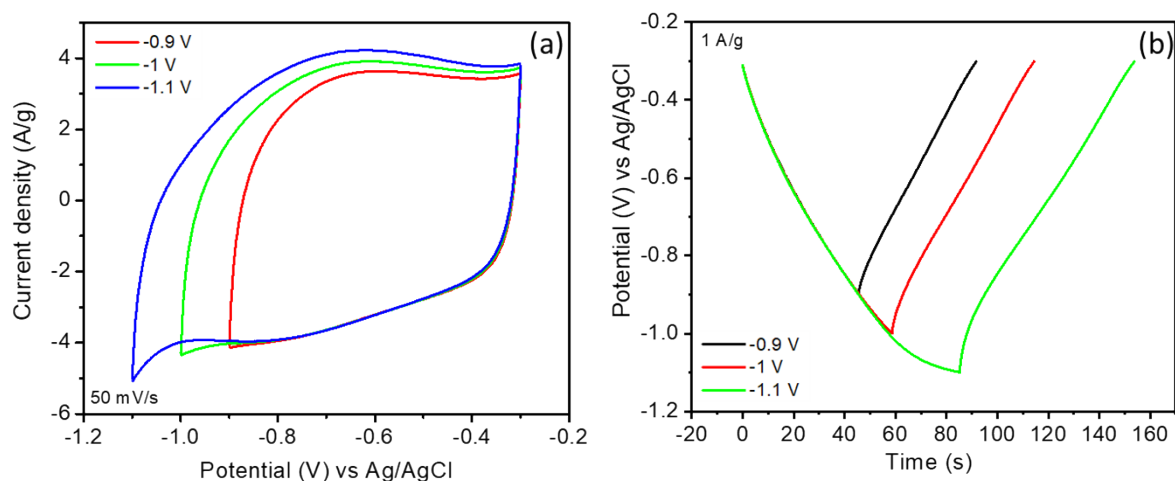

**Fig. S2** (a) CV curves, and (b) GCD profiles of N-doped  $V_4C_3/C$  nanohybrid in different potential windows.

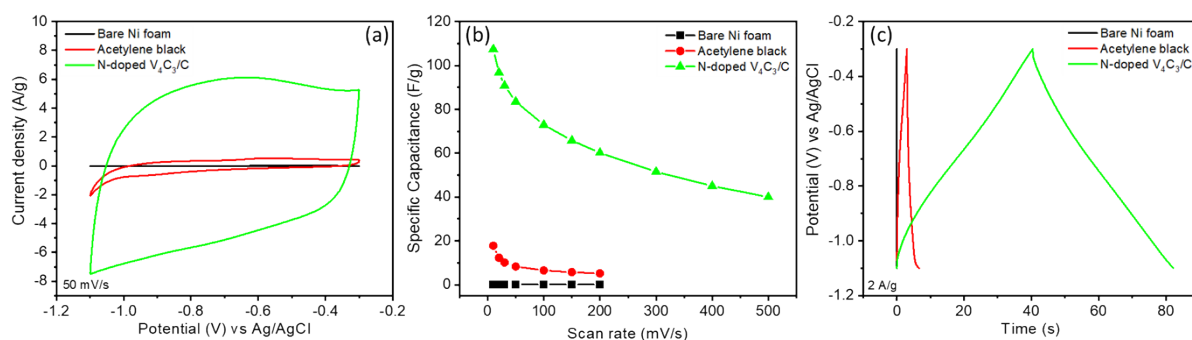

**Fig. S3** (a) Comparative CV curves at 50 mV/s scan rate, (b) specific capacitance as a function of scan rate, and (c) GCD profiles at 2 A/g current density of bare Ni foam, acetylene black, and N-doped  $V_4C_3/C$  nanohybrid in -0.3 to -1.1 V (vs Ag/AgCl) potential window.

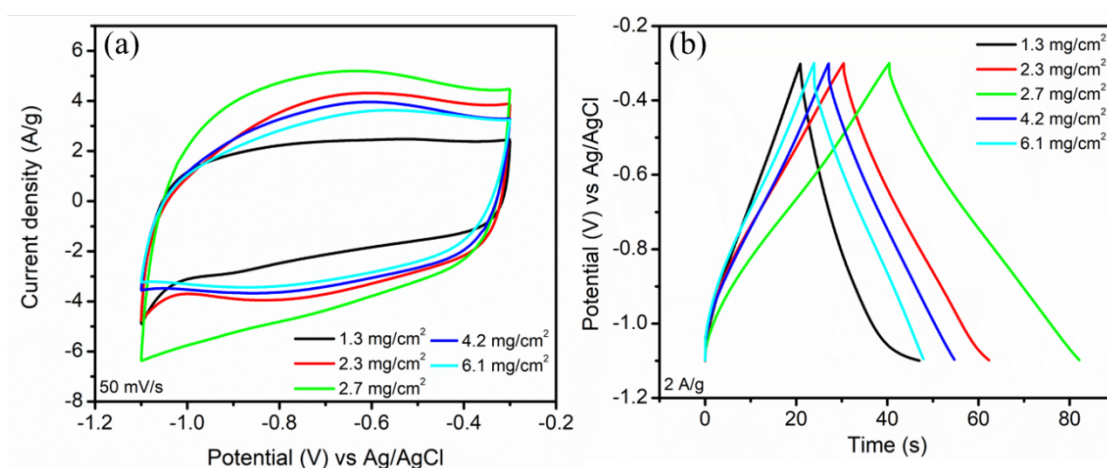

**Fig. S4** (a) CV curves of N-doped  $V_4C_3/C$  electrodes of different loading densities at 50 mV/s scan rate, and (b) GCD curves of N-doped  $V_4C_3/C$  electrodes of different loading densities at 2 A/g current density.

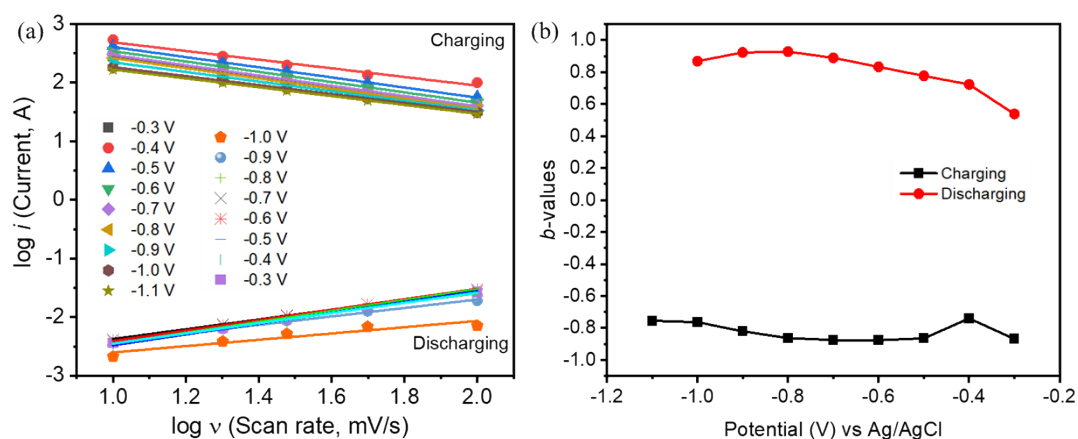

**Fig. S5** (a)  $\log i$  versus  $\log v$  plot for charging and discharging of N-doped  $V_4C_3/C$  electrode at different voltages, and (b) variation of  $b$ -values (slope) at different potentials for charging and discharging sweeps of CV.

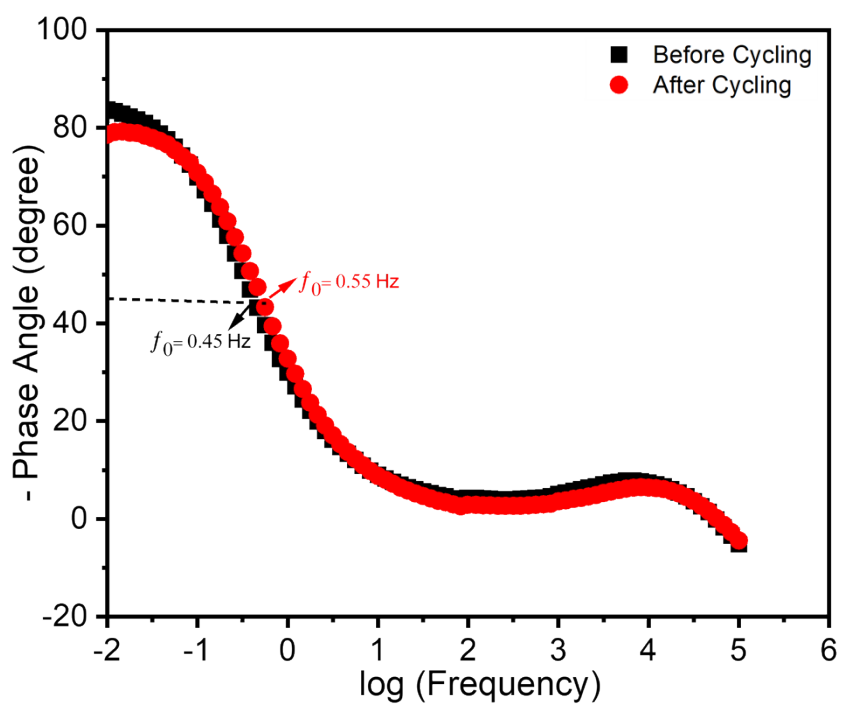

**Fig. S6** The Bode plot of N-doped  $V_4C_3/C$  electrode before and after cycling tests.

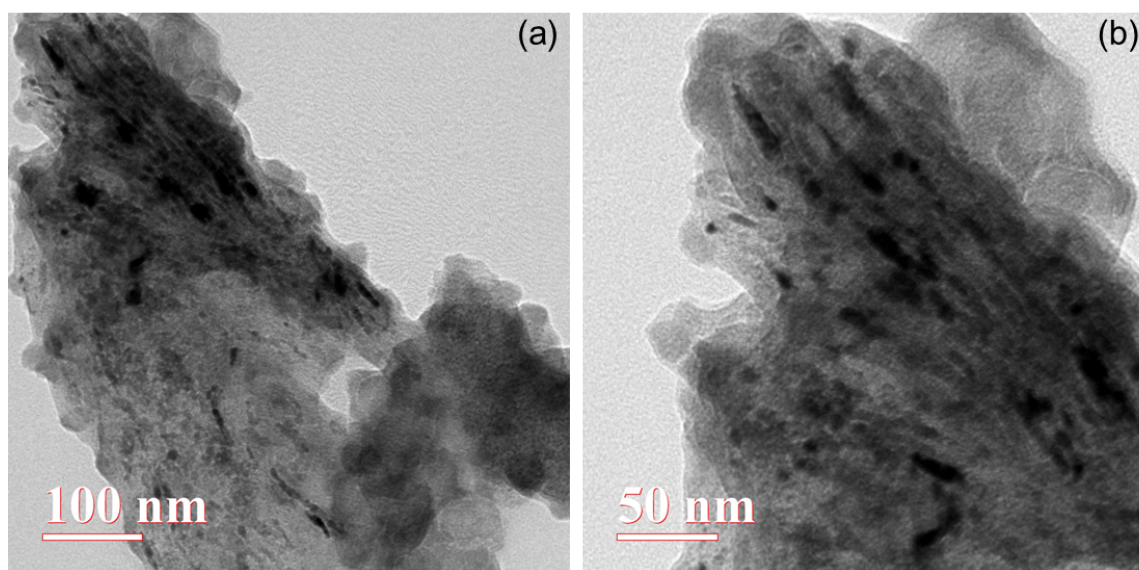

**Fig. S7** (a,b) TEM images at different magnifications of N-doped  $V_4C_3/C$  after 10,000 CV cycles at 100 mV/s scan rate in half-cell configuration.

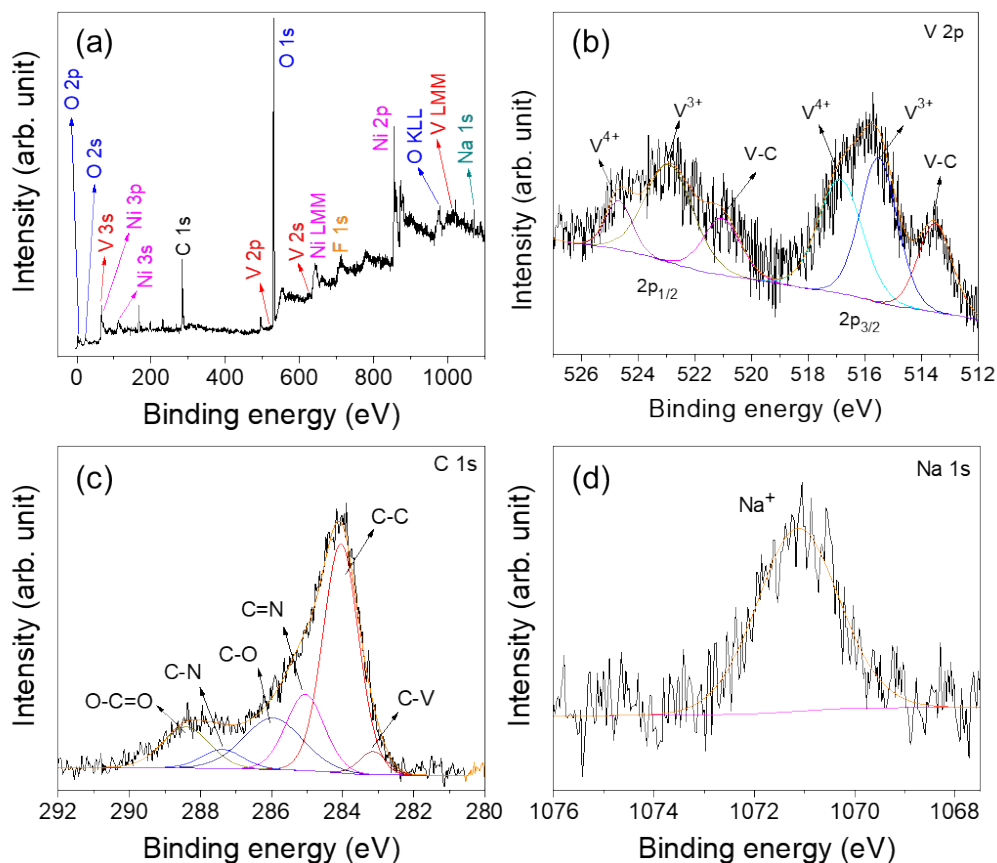

**Fig. S8** (a) XPS survey spectra, and high resolution spectra of (b) V 2p, (c) C 1s, and (d) Na 1s of N-doped  $V_4C_3/C$  after 10,000 CV cycles at 100 mV/s scan rate in half-cell configuration.

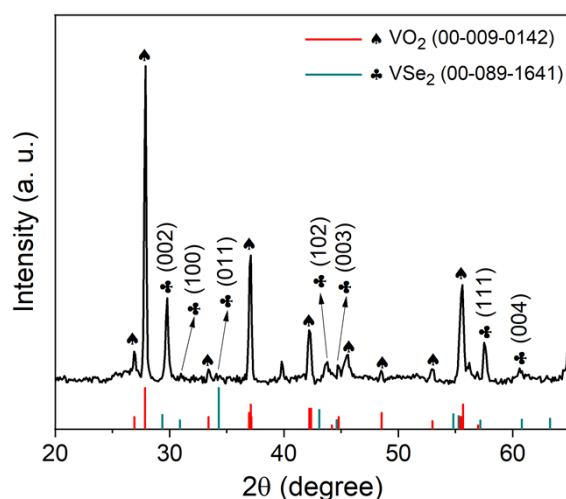

**Fig. S9** XRD spectra of as-synthesized  $VO_2/VSe_2$  hybrid nanoflowers. The XRD peaks are indexed with the Bragg reflections of monoclinic  $VO_2$  (JCPDS No.: 09-0142) and hexagonal  $VSe_2$  (JCPDS No. 89-1641).

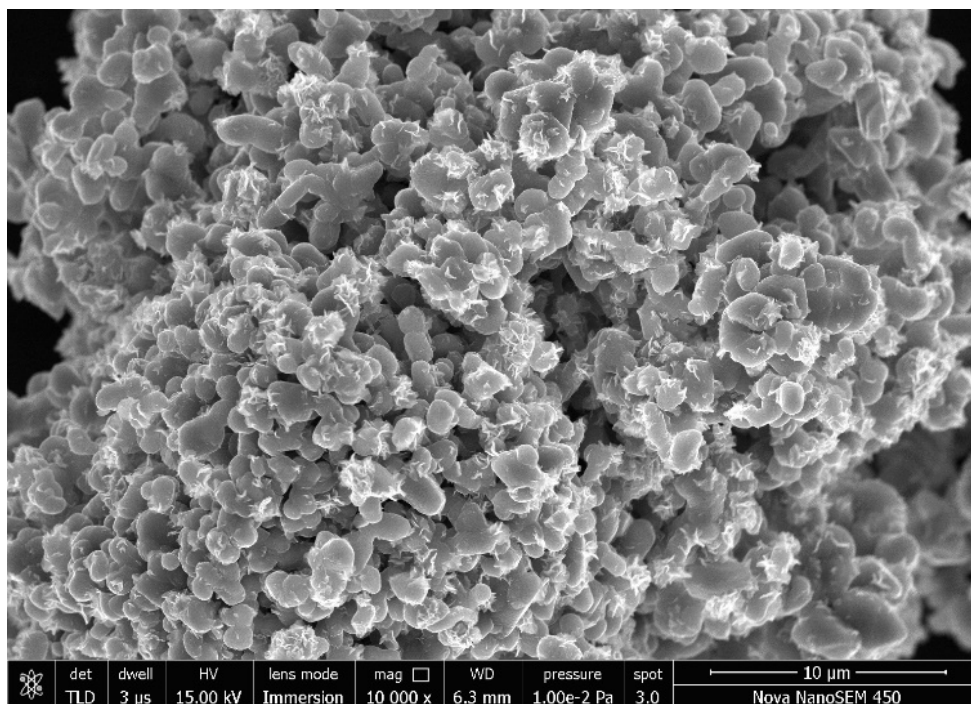

**Fig. S10** FESEM image of as-synthesized VO<sub>2</sub>/VSe<sub>2</sub> hybrid nanoflowers.

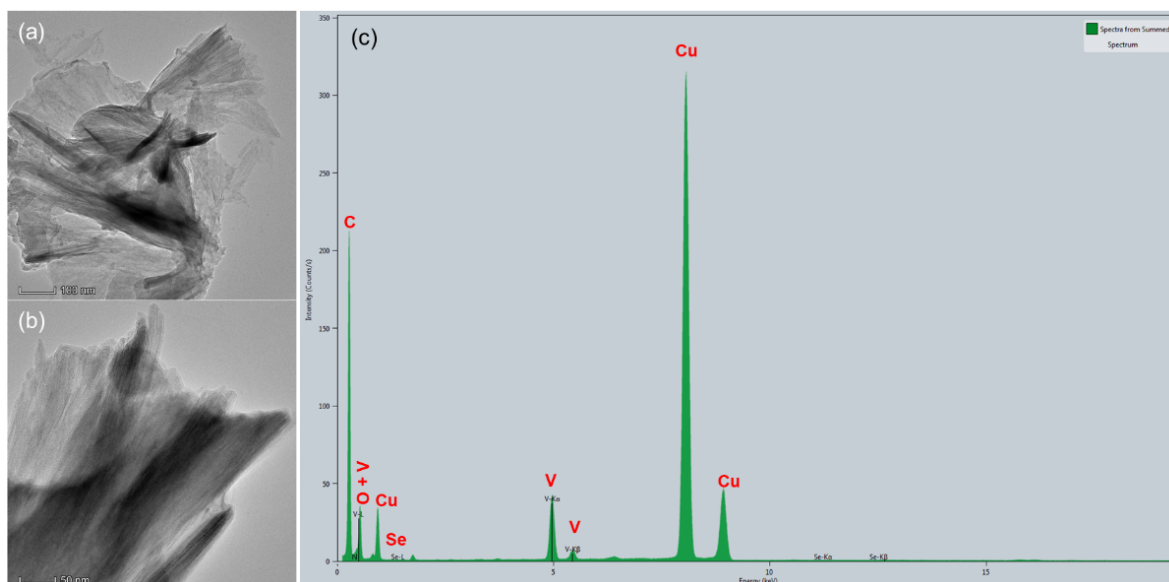

**Fig. S11** (a, b) TEM images of VO<sub>2</sub>/VSe<sub>2</sub> hybrid nanoflowers, and (c) EDS spectra showing presence of different constituent elements.



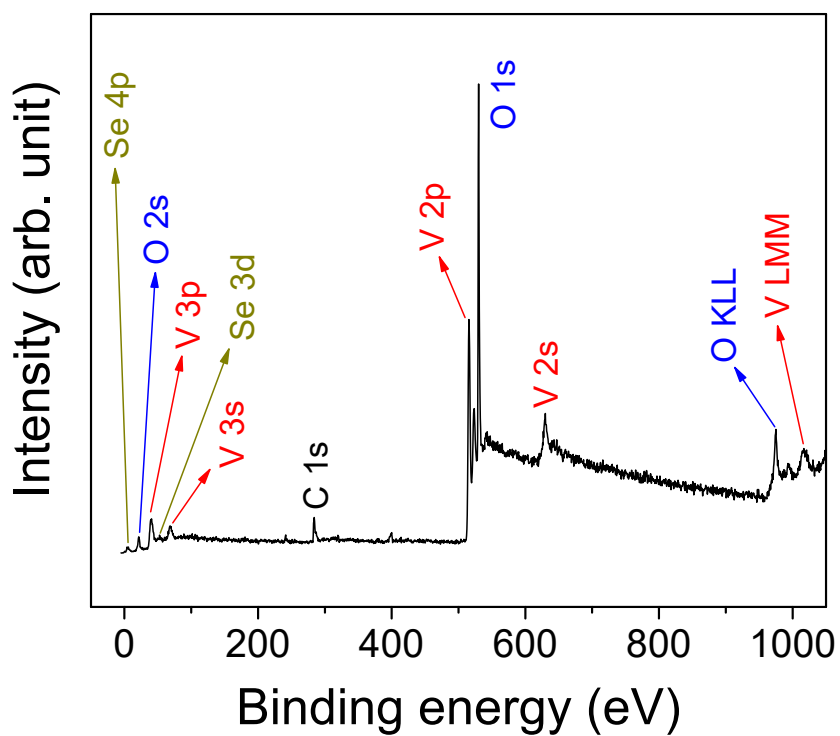

**Fig. S12** XPS survey spectra of  $\text{VO}_2/\text{VSe}_2$  hybrid nanostructures. A minute signal of C could be ascribed to some adventitious C present in the sample.

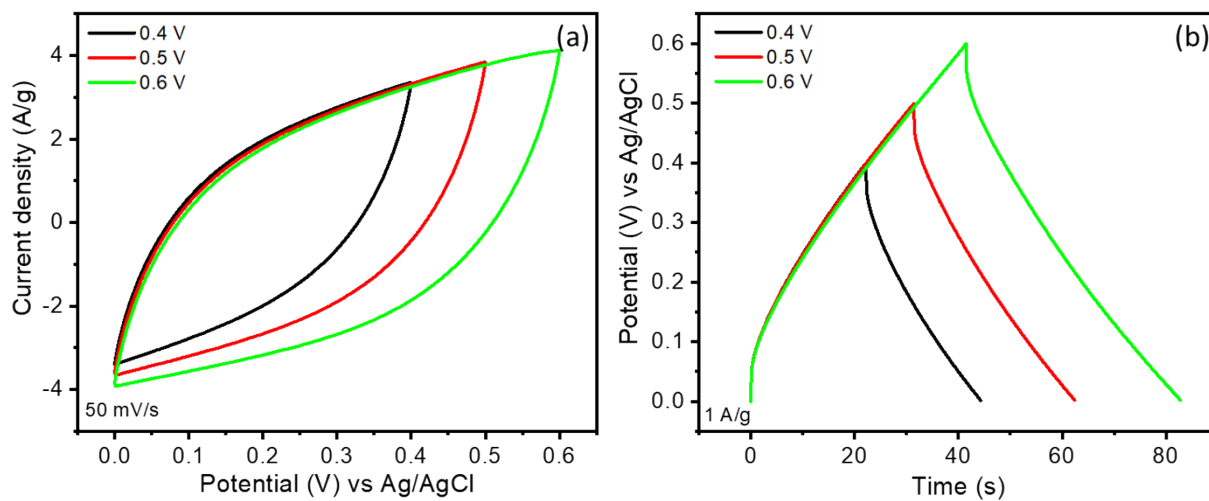

**Fig. S13** (a) CV curves at 50 mV/s, and (b) GCD curves at 1 A/g current density of  $\text{VO}_2/\text{VSe}_2$  electrode at various voltage windows.



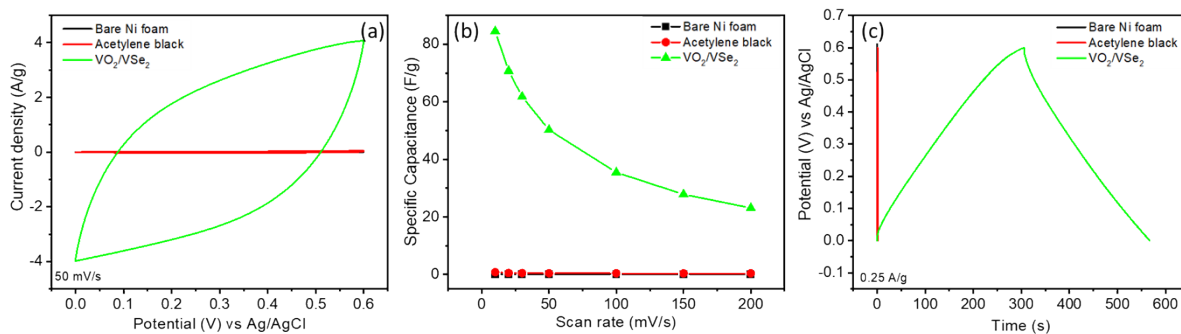

**Fig. S14** (a) Comparison of CV curves at 50 mV/s, (b) variation of capacitance with scan rate, and (c) GCD curves at 0.25 A/g current density of bare Ni foam, acetylene black, and VO<sub>2</sub>/VSe<sub>2</sub> electrode within 0-0.6 V (vs Ag/AgCl) voltage window.

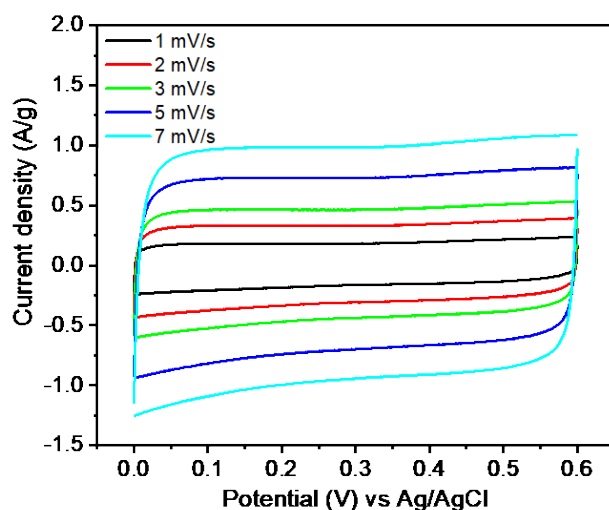

**Fig. S15** CV curves of the VO<sub>2</sub>/VSe<sub>2</sub> electrode at low scan rates ranging from 1-7 mV/s.

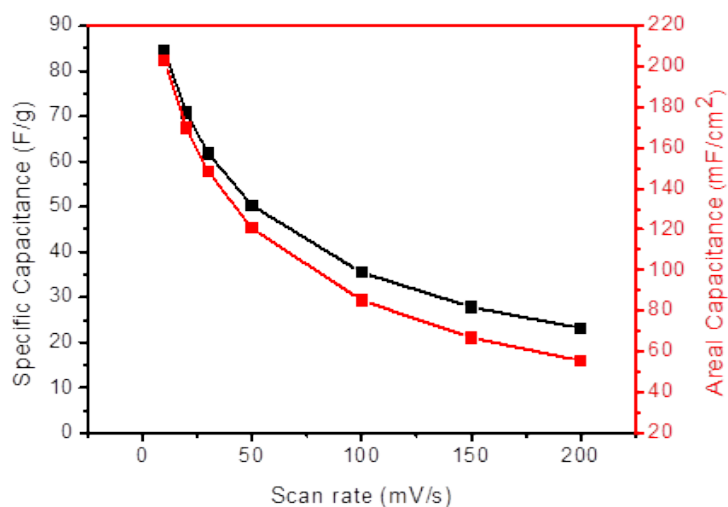

**Fig. S16** Variation of capacitance with scan rate for VO<sub>2</sub>/VSe<sub>2</sub> hybrid nanostructures.

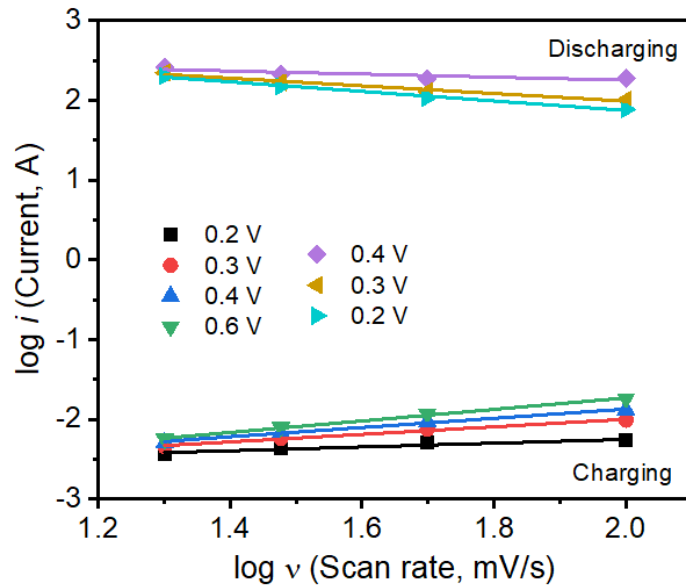

**Fig. S17**  $\log i$  versus  $\log v$  plot for charging and discharging of  $\text{VO}_2/\text{VSe}_2$  electrode at different voltages.

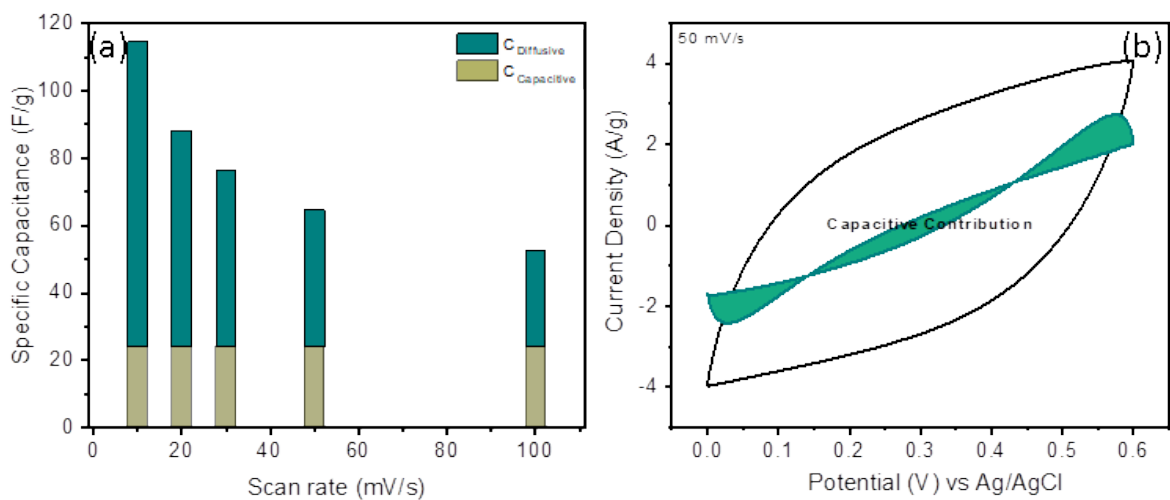

**Fig. S18** (a) Contributions from capacitive and diffusive processes of  $\text{VO}_2/\text{VSe}_2$  electrode at different scan rates, (b) comparison of capacitive (shaded region) and diffusion-dominated charge storage process at 50 mV/s scan rate for  $\text{VO}_2/\text{VSe}_2$  electrode.

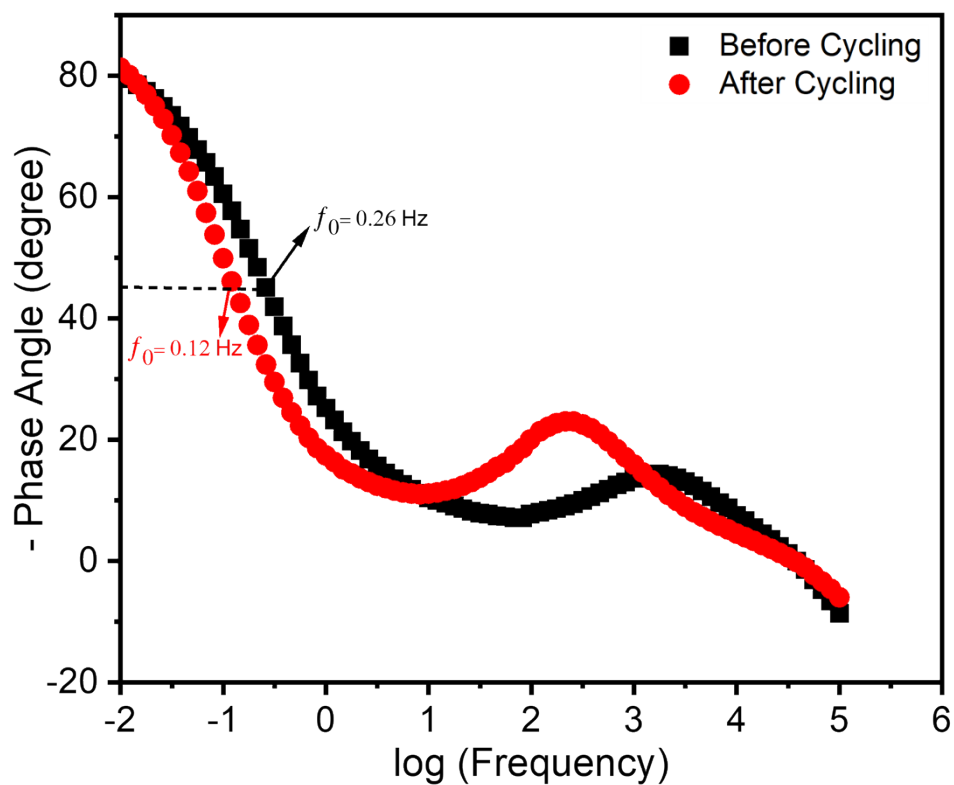

**Fig. S19** The Bode plot of VO<sub>2</sub>/VSe<sub>2</sub> electrode prior and after cycling test.

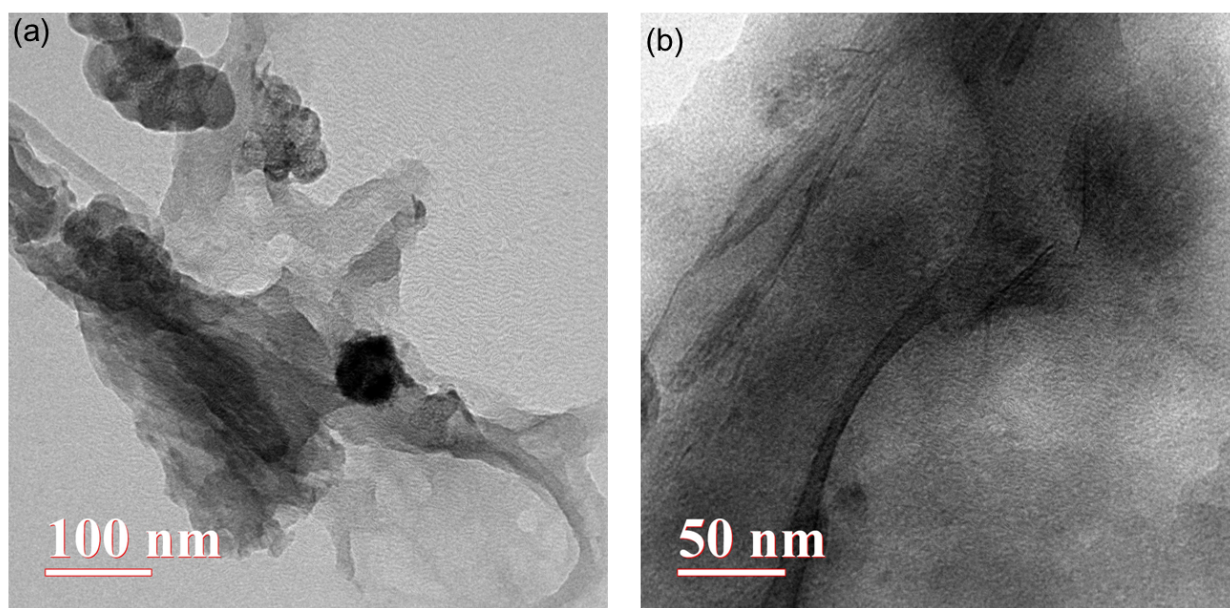

**Fig. S20** (a,b) TEM images of VO<sub>2</sub>/VSe<sub>2</sub> nanoflower after 10000 CV cycles at 100 mV/s scan rate in half-cell configuration.

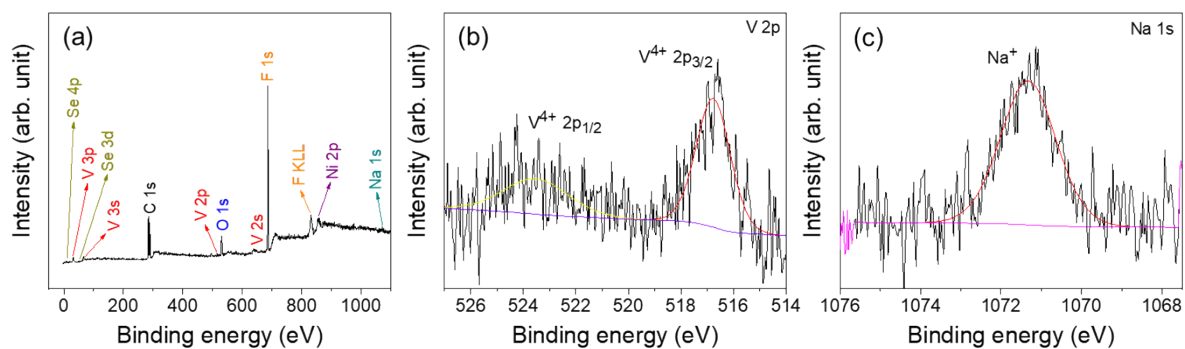

**Fig. S21** (a) XPS survey spectra, and high resolution spectra of (b) V 2p, and (c) Na 1s of VO<sub>2</sub>/VSe<sub>2</sub> nanoflower after 10,000 CV cycles at 100 mV/s scan rate in half-cell configuration.

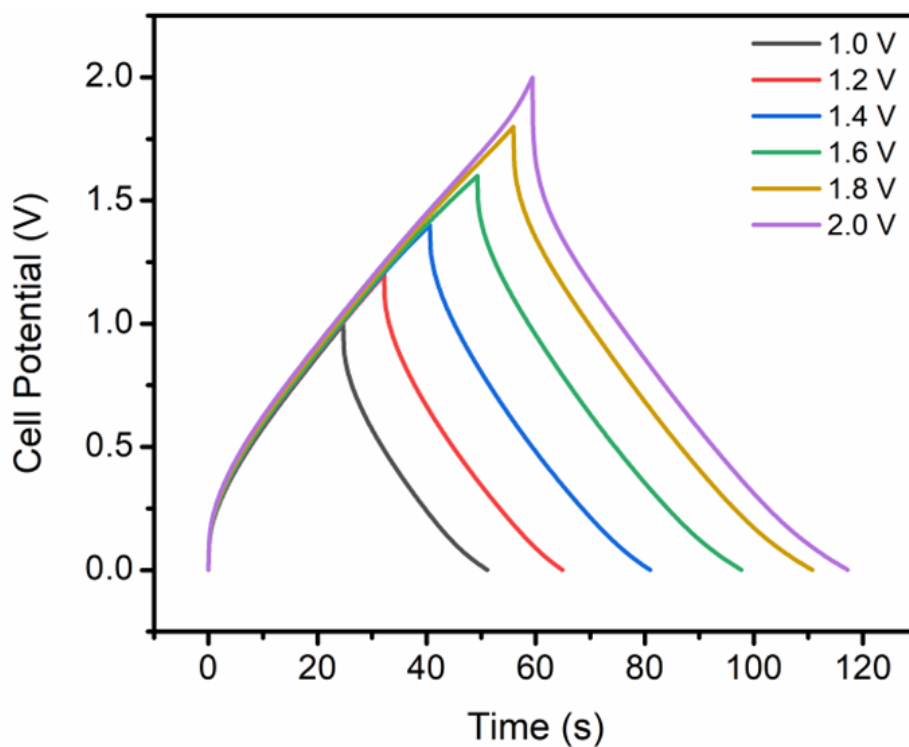

**Fig. S22** GCD curves of N-doped V<sub>4</sub>C<sub>3</sub>/C//VO<sub>2</sub>/VSe<sub>2</sub> ASC within different voltage windows ranging from 1 V to 2 V at 1 A/g current density.

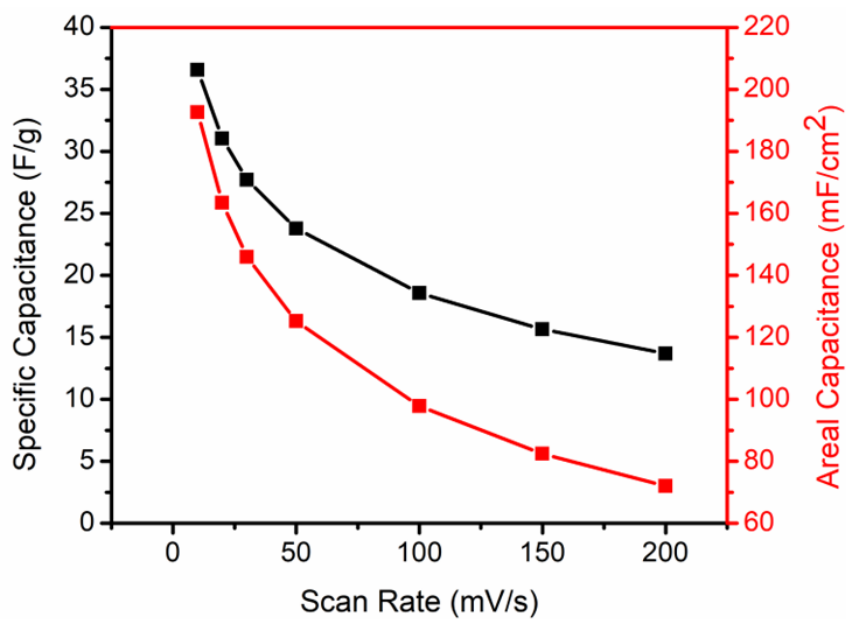

**Fig. S23** Variation of capacitance values with scan rate for N-doped  $V_4C_3/C//VO_2/VSe_2$  ASC.

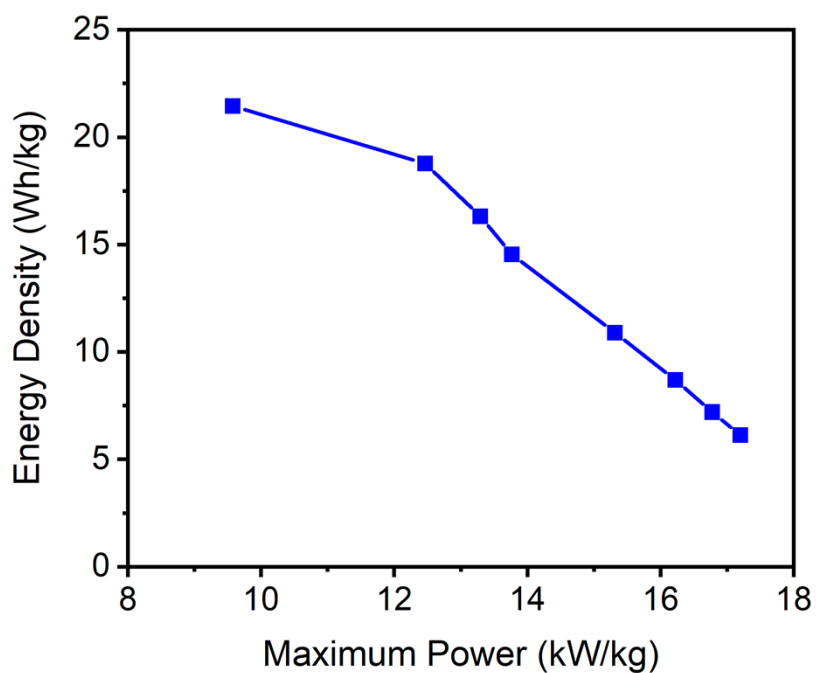

**Fig. S24** The Ragone plot where the power densities are calculated using maximum power transfer theorem (Eq. 8).

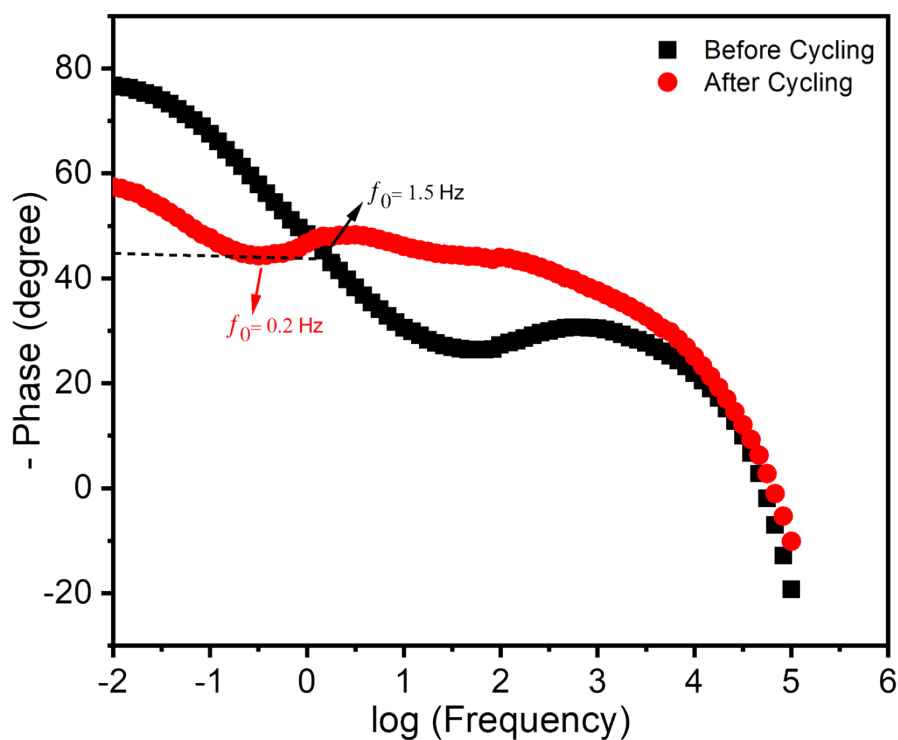

**Fig. S25** The Bode plot of N-doped  $V_4C_3/C//VO_2/VSe_2$  ASC before and after cycling test.

**Table S1** Resistance values obtained before and after cycling tests by fitting Nyquist plots of single electrode as well as assembled ASC with equivalent circuit model as shown in the inset of Fig. 3i, Fig. 5f, and inset of Fig. 6i.

| Type                                                         | Ohmic resistance<br>( $R_{el}$ , $\Omega$ ) | Charge transfer<br>resistance<br>( $R_{ct}$ , $\Omega$ ) | Warburg<br>impedance<br>( $R_w$ , $\Omega$ ) |
|--------------------------------------------------------------|---------------------------------------------|----------------------------------------------------------|----------------------------------------------|
| N-doped $V_4C_3/C$<br>(before cycling)                       | 1.4                                         | 0.5                                                      | -                                            |
| N-doped $V_4C_3/C$<br>(after cycling)                        | 1.4                                         | 1.6                                                      | -                                            |
| $VO_2/VSe_2$<br>(before cycling)                             | 1.8                                         | 1.7                                                      | 4                                            |
| $VO_2/VSe_2$<br>(after cycling)                              | 1.8                                         | 4.8                                                      | 0.2                                          |
| N-doped<br>$V_4C_3/C//VO_2/VSe_2$<br>ASC<br>(before cycling) | 1.2                                         | 6.6                                                      | 28.8                                         |
| N-doped<br>$V_4C_3/C//VO_2/VSe_2$ ASC<br>(after cycling)     | 1                                           | 3000                                                     | 62                                           |

**Table S2** Comparison of electrochemical performance of N-doped V<sub>4</sub>C<sub>3</sub>/C and VO<sub>2</sub>/VSe<sub>2</sub> with other pseudocapacitive materials.

| Sl. No. | Material Used                                                  | Half-Cell Measurements                 |                                      |                               | Full-Cell Measurements                                                          |                                        |                                     |                                     |                              | Ref.             |
|---------|----------------------------------------------------------------|----------------------------------------|--------------------------------------|-------------------------------|---------------------------------------------------------------------------------|----------------------------------------|-------------------------------------|-------------------------------------|------------------------------|------------------|
|         |                                                                | Electrolyte                            | Specific Capacitance                 | Cyclic Retention              | Full-Cell (+)//(-)                                                              | Electrolyte                            | Specific Capacitance                | Max. Energy Density & Power Density | Cyclic Retention             |                  |
| 1       | <b>N-doped V<sub>4</sub>C<sub>3</sub>/C</b>                    | <b>1M Na<sub>2</sub>SO<sub>4</sub></b> | <b>118 F/g at 0.75 A/g</b>           | <b>74% after 10000 cycles</b> | <b>N-doped V<sub>4</sub>C<sub>3</sub>/C//VO<sub>2</sub>/VSe<sub>2</sub> ASC</b> | <b>1M Na<sub>2</sub>SO<sub>4</sub></b> | <b>50.6 F/g at 0.25 A/g</b>         | <b>21.4 Wh/kg and 4.5 kW/kg</b>     | <b>78% after 5000 cycles</b> | <b>This Work</b> |
| 2       | <b>VO<sub>2</sub>/VSe<sub>2</sub></b>                          | <b>1M Na<sub>2</sub>SO<sub>4</sub></b> | <b>108.9 F/g at 0.25 A/g</b>         | <b>97% after 10000 cycles</b> |                                                                                 |                                        |                                     |                                     |                              |                  |
| 3       | VN/V <sub>2</sub> O <sub>3</sub> /C                            | 1M Na <sub>2</sub> SO <sub>4</sub>     | 112 F/g at 10 mV/s                   | 99.4% after 4000 cycles       | VN/V <sub>2</sub> O <sub>3</sub> /C SSC                                         | 1M Na <sub>2</sub> SO <sub>4</sub>     | 10.5 F/g at 10 mV/s                 | 1.55 Wh/kg at 14 W/kg               | 87% after 2000 cycles        | 1                |
| 4       | V <sub>8</sub> C <sub>7</sub>                                  | 1M Na <sub>2</sub> SO <sub>4</sub>     | 161.7 F/g at 1 A/g                   | 92.8% after 10000 cycles      | V <sub>8</sub> C <sub>7</sub> //AC ASC                                          | 1M Na <sub>2</sub> SO <sub>4</sub>     | 37.5 F/g at 1 A/g                   | 16.9 Wh/kg at 8.7 kW/kg             | 100% after 5000 cycles       | 2                |
| 5       | V <sub>2</sub> NT <sub>x</sub> Mxene (T <sub>x</sub> = -F, -O) | 3.5M KOH                               | 112.8 F/g at 1.85 mA/cm <sup>2</sup> | -                             | Mn <sub>3</sub> O <sub>4</sub> //V <sub>2</sub> NT <sub>x</sub> MXene           | 3.5M KOH                               | 25.3 F/g at 1.85 mA/cm <sup>2</sup> | 15.7 Wh/kg at 3748.4 W/kg           | 96% after 10000 cycles       | 3                |
| 6       | VC                                                             | 1M H <sub>2</sub> SO <sub>4</sub>      | 95.6 F/g at 1 A/g                    | 38.9% after 10000 cycles      | -                                                                               | -                                      | -                                   | -                                   | -                            | 4                |
| 7       | V <sub>2</sub> O <sub>3</sub>                                  | 1M NaNO <sub>3</sub>                   | 119 F/g at 0.05 A/g                  | -                             | -                                                                               | -                                      | -                                   | -                                   | -                            | 5                |
| 8       | V <sub>2</sub> O <sub>3</sub> /C                               | 1M Na <sub>2</sub> SO <sub>4</sub>     | 146 F/g at 1 A/g                     | 39.7% after 100 cycles        | -                                                                               | -                                      | -                                   | 20.2 Wh/kg at 500 W/kg              | -                            | 6                |
| 9       | VN                                                             | 2M KOH                                 | 50.2 F/g at 1 A/g                    | -                             | -                                                                               | -                                      | -                                   | -                                   | -                            | 7                |
| 10      | VNNP@G O                                                       | 2M KOH                                 | 109.7 F/g at 1 A/g                   | 93% after 5000 cycles         | -                                                                               | -                                      | -                                   | -                                   | -                            | 7                |
| 11      | MoSe <sub>2</sub>                                              | 2M KOH                                 | 115 F/g at 2 A/g                     | 64% after 2000 cycles         | MoSe <sub>2</sub> SSC                                                           | 2M KOH                                 | 4.1 F/g at 0.5 A/g                  | 184.5 mWh/kg at 74.6 mW/kg          | 105% after 10000 cycles      | 8                |
| 12      | MnSe(20)/Ni Co <sub>2</sub> O <sub>4</sub>                     | 3M KOH                                 | 450.8 F/g at 0.1 A/g                 | -                             | MnSe(20)/Ni Co <sub>2</sub> O <sub>4</sub> //dip coated graphene                | 3M KOH                                 | 45.8 F/g at 0.1 A/g                 | 12.4 Wh/kg at 70.0 W/kg             | 86% after 5000 cycles        | 9                |



|    |                                |        |                       |                         |                                    |        |                      |                            |                           |    |
|----|--------------------------------|--------|-----------------------|-------------------------|------------------------------------|--------|----------------------|----------------------------|---------------------------|----|
| 13 | CoSe <sub>2</sub>              | 6M KOH | 333.0 F/g at 1 A/g    | -                       | CoSe <sub>2</sub> //AC             | 6M KOH | 56.7 F/g at 0.5 A/g  | 18.9 Wh/kg at 387 W/kg     | 100.9% after 25000 cycles | 10 |
| 14 | VOCNT@Co <sub>0.85</sub> Se/NF | 2M KOH | 638 F/g at 1 A/g      | 97.3% after 5000 cycles | VOCNT@Co <sub>0.85</sub> Se/NF//AC | 2M KOH | 91.5 F/g at 0.5 A/g  | 21.47 Wh/kg at 325 W/kg    | 112.7% after 3000 cycles  | 11 |
| 15 | NiSe <sub>2</sub>              | 1M KOH | 75 F/g at 2 mV/s      | 92% after 5000 cycles   | -                                  | -      | -                    | -                          | -                         | 12 |
| 16 | Ni <sub>0.85</sub> Se-2        | 2M KOH | 1010 F/g at 1 A/g     | 91.3% after 1000 cycles | Ni <sub>0.85</sub> Se-2//AC ASC    | 2M KOH | 45 F/g at 1 A/g      | 18.1 Wh/kg at 844.5 W/kg   | 82.2% after 3000 cycles   | 13 |
| 17 | Zn-Co-Se                       | 1M KOH | 522.41 F/g at 0.5 A/g | 93% after 3000 cycles   | Zn-Co-Se//Graphene ink ASC         | 1M KOH | 15.09 F/g at 0.2 A/g | 16.97 Wh/kg at 539.63 W/kg | 95% after 5000 cycles     | 14 |

## References:

1. Y. Zhang, X. Wang, J. Zheng, T. Hu, X. Liu and C. Meng, *Appl. Surf. Sci.*, 2019, **471**, 842-851.
2. L. Zhang, W.-B. Zhang, Q. Zhang, X. Bao and X.-J. Ma, *Intermetallics*, 2020, **127**, 106976.
3. S. Venkateshalu, J. Cherusseri, M. Karnan, K.S. Kumar, P. Kollu, M. Sathish, J. Thomas, S.K. Jeong and A.N. Grace, *ACS Omega*, 2020, **5**, 17983-17992.
4. J. Gao, C. Xu, X. Tian, M. Sun, J. Zhao, J.-Y. Ma, H. Zhou, J. Xiao and M. Wu, *Sol. Energy*, 2020, **206**, 848-854.
5. X. Zhang, Z. Bu, R. Xu, B. Xie and H.-Y. Li, *Funct. Mater. Lett.*, 2017, **10**, 1750077.
6. J. Zheng, Y. Zhang, X. Jing, X. Liu, T. Hu, T. Lv, S. Zhang and C. Meng, *Colloids Surf. A: Physicochem. Eng. Asp.*, 2017, **518**, 188-196.
7. T. He, Z. Wang, X. Li, Y. Tan, Y. Liu, L. Kong, L. Kang, C. Chen and F. Ran, *J. Alloys Compd.*, 2019, **781**, 1054-1058.
8. S. Upadhyay and O.P. Pandey, *J. Alloys Compd.*, 2021, **857**, 157522.
9. V. Raman, D. Chinnadurai, R. Rajmohan, V.T. Chebrolu, V. Rajangam and H.-J. Kim, *New J. Chem.*, 2019, **43**, 12630-12640.
10. S. Liu, S. Sarwar, J. Wang, H. Zhang, T. Li, J. Luo and X. Zhang, *J. Mater. Chem. C*, 2021, **9**, 228-237.
11. H. Chen, W. Li, M. He, X. Chang, X. Zheng and Z. Ren, *J. Alloys Compd.*, 2021, **855**, 157506.
12. N.S. Arul and J.I. Han, *Mater. Lett.*, 2016, **181**, 345-349.
13. Q. Yang, X. Chen, H. Zhan, S. Wu, Q. Hu, R. Zhou and Y. Xue, *Synth. Met.*, 2019, **257**, 116167.
14. V.T. Chebrolu, B. Balakrishnan, D. Chinnadurai and H.J. Kim, *Adv. Mater. Technol.*, 2020, **5**, 1900873.
